# Supplementary material for: Clinical Validation of a Highly Sensitive GC-MS Platform for Routine Urine Drug Screening and Real-Time Reporting of up to 212 Drugs
Source: Hindawi journal article supplement (doi:10.1155/2013/329407), 2013-01-01
Supplement: f1 [file 329407.f1.pdf]

|    | Drug/metabolite                                         | Detectable Urine Concentration (ng/mL) |
|----|---------------------------------------------------------|----------------------------------------|
| 1  | 10, 11-Carbamazepine Epoxide (Carbamazepine Metabolite) | 10                                     |
| 2  | 1-Benzylpiperazine                                      | 2000                                   |
| 3  | 3-Trifluoromethylphenyl-Piperazine                      | 100                                    |
| 4  | 6-Monoacetylmorphine (Heroin Metabolite)                | 50                                     |
| 5  | 7-Aminoclonazepam (Clonazepam Metabolite)               | 1000                                   |
| 6  | 7-Aminoflunitrazepam (Flunitrazepam Metabolite)         | 100                                    |
| 7  | Acetaminophen (Tylenol)                                 | 1000                                   |
| 8  | Alfentanil                                              | 100                                    |
| 9  | Alpha-Hydroxyalprazolam (Xanax Metabolite)              | 10000                                  |
| 10 | Alprazolam (Xanax)                                      | 10                                     |
| 11 | Amantadine (Symmetrel)                                  | 1000                                   |
| 12 | Amitriptyline (Elavil)                                  | 100                                    |
| 13 | Amobarbital (Amytal)                                    | 10                                     |
| 14 | Amoxapine (Ascendin)                                    | 100                                    |
| 15 | Amphetamine                                             | 100                                    |
| 16 | Amphetamine Artifact                                    | 10                                     |
| 17 | Aprobarbital                                            | 100                                    |
| 18 | Atropine                                                | 100                                    |
| 19 | Barbital                                                | 100                                    |
| 20 | Benzoyllecgonine (Cocaine Metabolite)                   | 20000                                  |
| 21 | Benztropine (Cogentin)                                  | 100                                    |
| 22 | Brompheniramine (Dimetapp)                              | 10                                     |
| 23 | Buprenorphine                                           | 1000                                   |
| 24 | Bupropion (Wellbutrin)                                  | 100                                    |
| 25 | Bupropion Metabolite                                    | 100                                    |
| 26 | Buspirone                                               | 1000                                   |
| 27 | Butabarbital                                            | 1                                      |
| 28 | Butalbital                                              | 1                                      |
| 29 | Caffeine                                                | 1                                      |
| 30 | Carbamazepine (Tegretol)                                | 10                                     |
| 31 | Carisoprodol (Soma)                                     | 10                                     |
| 32 | Celecoxib (Celebrex)                                    | 10                                     |
| 33 | Chlorpheniramine                                        | 10                                     |
| 34 | Chlorpromazine (Thorazine)                              | 10                                     |
| 35 | Chlorpropamide                                          | 2000                                   |
| 36 | Chlorprothixene                                         | 10                                     |
| 37 | Citalopram / Escitalopram                               | 10                                     |
| 38 | Clomipramine (Anafranil)                                | 10                                     |
| 39 | Clonazepam                                              | 100                                    |
| 40 | Clonidine                                               | 1000                                   |

|    |                                                            |       |
|----|------------------------------------------------------------|-------|
| 41 | Clozapine (Clozaril, Leponex)                              | 1000  |
| 42 | Clozapine Metabolite                                       | 1000  |
| 43 | Cocaethylene                                               | 10    |
| 44 | Cocaine                                                    | 100   |
| 45 | Codeine                                                    | 10    |
| 46 | Cotinine (Nicotine Metabolite)                             | 100   |
| 47 | Cyclobenzaprine                                            | 10    |
| 48 | Cyproheptadine                                             | 10    |
| 49 | Delta-9 Thc Cooh                                           | 10    |
| 50 | Desalkylflurazepam (Flurazepam Metabolite)                 | 10    |
| 51 | Desipramine (Norpramin)                                    | 100   |
| 52 | Desmethyldoxepin (Nordoxepin)                              | 1000  |
| 53 | Dextromethorphan                                           | 10    |
| 54 | Dextrorphan (Dextromethorphan Metabolite; See Levorphanol) | 100   |
| 55 | Diacetylmorphine (Heroin)                                  | 10    |
| 56 | Diazepam (Valium)                                          | 10    |
| 57 | Diethylpropion                                             | 10    |
| 58 | Dihydrocodeine                                             | 10    |
| 59 | Diltiazem (Cardizem)                                       | 10    |
| 60 | Diphenhydramine / Dimenhydrinate (Benadryl/Dramamine)      | 10    |
| 61 | Disopyramide (Norpace, Rythmodan)                          | 1000  |
| 62 | Doxepin (Sinequan)                                         | 10    |
| 63 | Doxepin (Trans)                                            | 10    |
| 64 | Doxylamine                                                 | 100   |
| 65 | Duloxetine                                                 | 20000 |
| 66 | Ecgonine Methyl Ester (Cocaine Metabolite)                 | 10    |
| 67 | Eddp (Methadone Metabolite)                                | 100   |
| 68 | Ephedrine / Pseudoephedrine                                | 20000 |
| 69 | Ethinamate                                                 | 100   |
| 70 | Ethosuximide (Zarontin)                                    | 10    |
| 71 | Ethotoin                                                   | 10    |
| 72 | Etomidate                                                  | 10    |
| 73 | Fentanyl                                                   | 1000  |
| 74 | Fluconazole                                                | 100   |
| 75 | Flunitrazepam (Rohypnol)                                   | 100   |
| 76 | Fluoxetine (Prozac)                                        | 1000  |
| 77 | Fluphenazine                                               | 10000 |
| 78 | Flurazepam (Dalmane)                                       | 100   |
| 79 | Gabapentin (Neurontin)                                     | 10000 |
| 80 | Gemfibrozil                                                | 100   |
| 81 | Glutethimide (Doriden)                                     | 10    |
| 82 | Guaifenesin/Methocarbamol                                  | 100   |
| 83 | Haloperidol (Haldol)                                       | 1000  |
| 84 | Hydrocodone                                                | 100   |

|     |                                           |       |
|-----|-------------------------------------------|-------|
| 85  | Hydromorphone (Dilaudid)                  | 1000  |
| 86  | Hydroxyzine (Atarax, Vistaril)            | 1000  |
| 87  | Ibuprofen (Advil, Motrin)                 | 100   |
| 88  | Imipramine (Tofranil)                     | 10    |
| 89  | Jwh-018 [1-Pentyl-3-(1-Naphthoyl)Indole]  | 1000  |
| 90  | Ketamine                                  | 10    |
| 91  | Lamotrigine                               | 1000  |
| 92  | Levamisole                                | 10    |
| 93  | Levetiracetam (Keppra)                    | 100   |
| 94  | Levorphanol/Dextrorphan (Optical Isomers) | 100   |
| 95  | Lidocaine (Xylocaine)                     | 10    |
| 96  | Lorazepam (Ativan)                        | 1000  |
| 97  | Loxapine                                  | 100   |
| 98  | Maprotiline (Ludiomil)                    | 100   |
| 99  | Meperidine (Demerol)                      | 1     |
| 100 | Mephobarbital                             | 100   |
| 101 | Mepivacaine                               | 100   |
| 102 | Meprobamate (Equanil, Miltown)            | 100   |
| 103 | Mescaline                                 | 2000  |
| 104 | Metaxalone                                | 10    |
| 105 | Methadone (Dolophine)                     | 100   |
| 106 | Methadone Metabolite (Eddp)               | 100   |
| 107 | Methamphetamine                           | 100   |
| 108 | Methaqualone (Quaalude)                   | 10    |
| 109 | Methcathinone                             | 1000  |
| 110 | Methocarbamol (Robaxin)                   | 2000  |
| 111 | Methsuximide                              | 10    |
| 112 | Methyl Salicylate                         | 1     |
| 113 | Methylenedioxyamphetamine (Mda)           | 1000  |
| 114 | Methylenedioxymethamphetamine (Mdma)      | 100   |
| 115 | Methylenedioxyprovalerone                 | 10    |
| 116 | Methylphenidate (Ritalin, Concerta)       | 10    |
| 117 | Methypylon                                | 10    |
| 118 | Metoclopramide (Reglan)                   | 100   |
| 119 | Metoprolol (Lopressor)                    | 2000  |
| 120 | Metronidazole (Flagyl)                    | 100   |
| 121 | Midazolam (Versed)                        | 10    |
| 122 | Mirtazapine                               | 10    |
| 123 | Morphine                                  | 1000  |
| 124 | N-Acetyl Procainamide (Napa)              | 1000  |
| 125 | Nalbuphine                                | 1000  |
| 126 | Nalorphine                                | 100   |
| 127 | Naproxen (Aleve, Naprosyn)                | 1000  |
| 128 | Naproxen Metabolite                       | 20000 |

|     |                                     |       |
|-----|-------------------------------------|-------|
| 129 | Nicotine                            | 100   |
| 130 | Norbuprenorphine                    | 2000  |
| 131 | Nordiazepam                         | 1     |
| 132 | Norfentanyl                         | 100   |
| 133 | Norfluoxetine                       | 10000 |
| 134 | Norketamine                         | 100   |
| 135 | Normeperidine                       | 1000  |
| 136 | Normethsuximide                     | 100   |
| 137 | Norpropoxyphene                     | 100   |
| 138 | Norpropoxyphene (Isomer 2)          | 100   |
| 139 | Nortriptyline (Aventyl)             | 1000  |
| 140 | Norverapamil                        | 1000  |
| 141 | Olanzapine (Zyprexa)                | 100   |
| 142 | Oxazepam (Serax)                    | 20000 |
| 143 | Oxcarbazepine (Breakdown Product)   | 100   |
| 144 | Oxcarbazepine (Trileptal, Trexapin) | 1000  |
| 145 | Oxycodone (Oxycontin)               | 100   |
| 146 | Oxymorphone (Numorphan)             | 1000  |
| 147 | Papaverine                          | 100   |
| 148 | Para Aminobenzoic Acid              | 20000 |
| 149 | Paraxanthine (Caffeine Metabolite)  | 4000  |
| 150 | Paroxetine (Paxil)                  | 1000  |
| 151 | Pentazocine (Talwin)                | 100   |
| 152 | Pentobarbital                       | 10    |
| 153 | Pentoxifylline (Trental)            | 10    |
| 154 | Phenacetin                          | 100   |
| 155 | Phenazopyridine                     | 1000  |
| 156 | Phencyclidine (Pcp)                 | 1     |
| 157 | Phenethylamine                      | 1     |
| 158 | Pheniramine                         | 10    |
| 159 | Phenmetrazine                       | 1000  |
| 160 | Phenobarbital                       | 100   |
| 161 | Phenothiazine                       | 10    |
| 162 | Phentermine                         | 1000  |
| 163 | Phenylbutazone                      | 100   |
| 164 | Phenylpropanolamine                 | 20000 |
| 165 | Phenytoin (Dilantin)                | 100   |
| 166 | Prazepam                            | 10    |
| 167 | Primidone (Mysoline)                | 100   |
| 168 | Procainamide                        | 1000  |
| 169 | Procaine                            | 1000  |
| 170 | Prochlorperazine (Compazine)        | 100   |
| 171 | Promethazine (Phenergan)            | 100   |
| 172 | Propofol                            | 100   |

|     |                                       |      |
|-----|---------------------------------------|------|
| 173 | Propoxyphene (Darvon)                 | 100  |
| 174 | Propranolol (Breakdown Product)       | 100  |
| 175 | Propranolol (Inderal)                 | 1000 |
| 176 | Protriptyline                         | 1000 |
| 177 | Psilocin                              | 4000 |
| 178 | Psilocybin                            | 8000 |
| 179 | Pyrilamine                            | 100  |
| 180 | Quetiapine (Seroquel)                 | 1000 |
| 181 | Quinidine / Quinine (Optical Isomers) | 1000 |
| 182 | Ranitidine (Zantac)                   | 1000 |
| 183 | Remifentanyl                          | 100  |
| 184 | Salicylamide                          | 1000 |
| 185 | Scopolamine                           | 100  |
| 186 | Secobarbital                          | 10   |
| 187 | Sertraline (Zoloft)                   | 100  |
| 188 | Strychnine                            | 100  |
| 189 | Sufentanyl                            | 100  |
| 190 | Talbutal                              | 100  |
| 191 | Temazepam (Restoril)                  | 100  |
| 192 | Tetrahydrocannabinol                  | 10   |
| 193 | Theophylline                          | 2000 |
| 194 | Thiopental (Pentothal)                | 100  |
| 195 | Thioridazine (Mellaril)               | 100  |
| 196 | Ticlodipne                            | 10   |
| 197 | Topiramate (Topamax)                  | 100  |
| 198 | Tramadol (Ultram)                     | 10   |
| 199 | Trazodone (Desyrel)                   | 1000 |
| 200 | Triazolam (Halcion)                   | 100  |
| 201 | Trifluoperazine (Stelazine)           | 100  |
| 202 | Triflupromazine                       | 100  |
| 203 | Trihexyphenidyl (Artane)              | 100  |
| 204 | Trimethoprim (Monotrim)               | 1000 |
| 205 | Trimipramine                          | 10   |
| 206 | Tripelennamine                        | 100  |
| 207 | Valproic Acid (Depakene, Depakote)    | 1000 |
| 208 | Venlafaxine (Effexor)                 | 10   |
| 209 | Verapamil                             | 1000 |
| 210 | Zaleplon (Sonata)                     | 100  |
| 211 | Zolpidem (Ambien)                     | 10   |
| 212 | Zopiclone (Lunesta)                   | 100  |
